# Supplementary material for: Nest site selection and nest survival of Black-backed Woodpeckers after wildfire
Source: Oxford University Press journal article supplement (doi:10.1093/condor/duz039), 2019-06-17
Supplement: duz039_suppl_supplemental-materials.pdf [file duz039_suppl_supplemental-materials.pdf]

## Supplemental Material

### Supplement to:

A.N. Stillman, R.B. Siegel, R.L. Wilkerson, M. Johnson, C.A. Howell, and M.W. Tingley.  
(2019) Nest site selection and nest survival of Black-backed Woodpeckers after wildfire. *The Condor: Ornithological Applications*.

### *Corresponding author:*

Andrew N. Stillman

Ecology & Evolutionary Biology, University of Connecticut, Storrs, CT

Phone: +1 (860) 486-5522.

Email: [andrew.stillman@uconn.edu](mailto:andrew.stillman@uconn.edu)

**Table S1.** Additional information on six wildfires where we monitored Black-backed Woodpecker nests between 2011 and 2018. Burn severity is shown as the percent change in canopy cover from pre-fire to immediately after fire, binned into four severity categories (0–24%, 25–49%, 50–74%, 75–100% change in canopy cover). Pre-fire habitat type is presented as the dominate California Wildlife Habitat Relationships (CWHR) classification within the fire area. Definitions of each habitat classification are provided at <https://www.wildlife.ca.gov/Data/CWHR/Wildlife-Habitats>.

| Fire name | National forest name | Ignition date | Fire size (ha) | Burn severity proportion by class |      | Dominant pre-fire habitat type (CWHR) |
|-----------|----------------------|---------------|----------------|-----------------------------------|------|---------------------------------------|
| Peterson  | Lassen               | 6/21<br>2018  | 3307           | 0–24%:                            | 0.52 | Eastside Pine (EPN)                   |
|           |                      |               |                | 25–49%:                           | 0.12 |                                       |
|           |                      |               |                | 50–74%:                           | 0.10 |                                       |
|           |                      |               |                | 75–100%:                          | 0.27 |                                       |
| Sugarloaf | Lassen               | 8/1<br>2009   | 3864           | 0–24%:                            | 0.24 | Ponderosa Pine (PPN)                  |
|           |                      |               |                | 25–49%:                           | 0.12 |                                       |
|           |                      |               |                | 50–74%:                           | 0.11 |                                       |
|           |                      |               |                | 75–100%:                          | 0.54 |                                       |
| Wheeler   | Plumas               | 7/5<br>2007   | 9484           | 0–24%:                            | 0.23 | Sierra Mixed Conifer (SMC)            |
|           |                      |               |                | 25–49%:                           | 0.09 |                                       |
|           |                      |               |                | 50–74%:                           | 0.10 |                                       |
|           |                      |               |                | 75–100%:                          | 0.58 |                                       |
| Moonlight | Plumas               | 9/3<br>2007   | 26509          | 0–24%:                            | 0.27 | Sierra Mixed Conifer                  |
|           |                      |               |                | 25–49%:                           | 0.08 |                                       |
|           |                      |               |                | 50–74%:                           | 0.08 |                                       |
|           |                      |               |                | 75–100%:                          | 0.56 |                                       |
| Chips     | Plumas/Lassen        | 7/28<br>2012  | 31114          | 0–24%:                            | 0.63 | Sierra Mixed Conifer, White Fir (WFR) |
|           |                      |               |                | 25–49%:                           | 0.08 |                                       |
|           |                      |               |                | 50–74%:                           | 0.06 |                                       |
|           |                      |               |                | 75–100%:                          | 0.23 |                                       |
| Bald      | Lassen/Shasta        | 7/30<br>2014  | 16258          | 0–24%:                            | 0.21 | Eastside Pine                         |
|           |                      |               |                | 25–49%:                           | 0.12 |                                       |
|           |                      |               |                | 50–74%:                           | 0.12 |                                       |
|           |                      |               |                | 75–100%:                          | 0.55 |                                       |

**Table S2.** Summary of field sampling effort for Black-backed Woodpecker nests in six post-fire areas of northern California, showing the number of nests monitored and the total number of observation intervals (i.e. the period between consecutive nest visits) recorded for each fire-year combination.

| <b>Fire name</b> | <b>Year</b>      | <b>Time since fire (years)</b> | <b>Nests</b> | <b>Observation intervals</b> |
|------------------|------------------|--------------------------------|--------------|------------------------------|
| Peterson         | 2011             | 3                              | 5            | 40                           |
| Sugarloaf        | 2011             | 2                              | 6            | 33                           |
| Wheeler          | 2012             | 5                              | 12           | 73                           |
|                  | 2013             | 6                              | 9            | 159                          |
| Moonlight        | 2014             | 7                              | 13           | 134                          |
|                  | 2015             | 8                              | 15           | 148                          |
|                  | 2016             | 9                              | 9            | 93                           |
|                  | 2017             | 10                             | 13           | 55                           |
| Chips            | 2017             | 5                              | 10           | 35                           |
|                  | 2018             | 6                              | 10           | 67                           |
| Bald             | 2017             | 3                              | 8            | 61                           |
|                  | 2018             | 4                              | 8            | 58                           |
| <b>Total:</b>    | <b>2011–2018</b> | <b>2–10</b>                    | <b>118</b>   | <b>956</b>                   |

**Table S3.** We created a set of 14 candidate models based on hypotheses about Black-backed Woodpecker nest survival relationships in post-fire forests. We grouped model covariates into three categories (habitat characteristics, nest tree characteristics, and abiotic/temporal variables) and evaluated every combination of these three groups. We also tested specific hypotheses regarding different mechanisms of nest survival risk, including predation, temperature/weather extremes, and nest abandonment due to low foraging success or cavity eviction. Models are shown in order of increasing LOOIC to facilitate comparisons to Table 2 in the main text. WAIC (Widely Applicable Information Criterion) model selection results are shown for the 14 candidate models, with  $\Delta$ WAIC given as the difference between each candidate model and the model with the lowest WAIC. WAIC values were calculated using pointwise log-likelihood values from 4500 posterior draws.

| <b>Model covariates</b>                                                                                     | <b>Hypothesis and rationale</b>                                                                                                                                | <b>WAIC</b> | <b><math>\Delta</math>WAIC</b> |
|-------------------------------------------------------------------------------------------------------------|----------------------------------------------------------------------------------------------------------------------------------------------------------------|-------------|--------------------------------|
| Initiation date + Nest day                                                                                  | Temporal factors alone influence nest survival.                                                                                                                | 283.23      | 0                              |
| Initiation date + Nest day + Temp anomaly                                                                   | Abiotic/temporal factors influence nest survival.                                                                                                              | 286.12      | 2.89                           |
| Intercept only                                                                                              | Nest survival is random with regards to the habitat characteristics, nest characteristics, and abiotic/temporal characteristics that we measured (null model). | 285.50      | 2.27                           |
| Initiation date + Snag count + Burn severity + Distance to edge + Time since fire                           | Habitat characteristics, as well as initiation date, influence nest survival.                                                                                  | 291.15      | 7.92                           |
| Initiation date + Tree DBH + Cavity height + Orientation                                                    | Nest characteristics, as well as initiation date, influence nest survival.                                                                                     | 294.64      | 11.41                          |
| Burn severity + Time since fire                                                                             | Burn severity and time since fire, which are potential indicators of foraging habitat quality, influence nest survival.                                        | 292.15      | 8.92                           |
| Tree DBH + Cavity height + Orientation                                                                      | Nest characteristics influence nest survival.                                                                                                                  | 292.41      | 9.18                           |
| Cavity height + Distance to edge                                                                            | Cavity height and distance to patch edge, which reflect potential predation risk, influence nest survival.                                                     | 296.00      | 12.77                          |
| Initiation date + Nest day + Temp anomaly + Snag count + Burn severity + Distance to edge + Time since fire | Abiotic/temporal factors and habitat characteristics, but not nest characteristics, influence nest survival.                                                   | 300.68      | 17.45                          |

|                                                                                                                                                               |                                                                                                                                                                                                  |        |       |
|---------------------------------------------------------------------------------------------------------------------------------------------------------------|--------------------------------------------------------------------------------------------------------------------------------------------------------------------------------------------------|--------|-------|
| Initiation date + Nest day + Temp anomaly<br>+ Tree DBH + Cavity height + Orientation                                                                         | Abiotic/temporal factors and nest characteristics, but not habitat characteristics, influence nest survival.                                                                                     | 304.74 | 21.51 |
| Cavity height + Distance to edge<br>+ Time since fire + Nest day                                                                                              | Predation risk increases with time since fire and decreases with distance to edge and increasing cavity height. Older nests, which have more vocal nestlings, will have a higher predation risk. | 300.11 | 16.88 |
| Snag count + Burn severity<br>+ Distance to edge + Time since fire                                                                                            | Habitat characteristics influence nest survival.                                                                                                                                                 | 302.27 | 19.04 |
| Snag count + Burn severity<br>+ Distance to edge + Time since fire<br>+ Tree DBH + Cavity height + Orientation                                                | Habitat characteristics and nest characteristics, but not abiotic/temporal variables, influence nest survival.                                                                                   | 301.19 | 17.96 |
| Initiation date + Nest day + Temp anomaly<br>+ Snag count + Burn severity<br>+ Distance to edge + Time since fire<br>+ Tree DBH + Cavity height + Orientation | All habitat characteristics, nest characteristics, and abiotic/temporal characteristics that we measured influence nest survival (global model).                                                 | 311.53 | 28.3  |

---

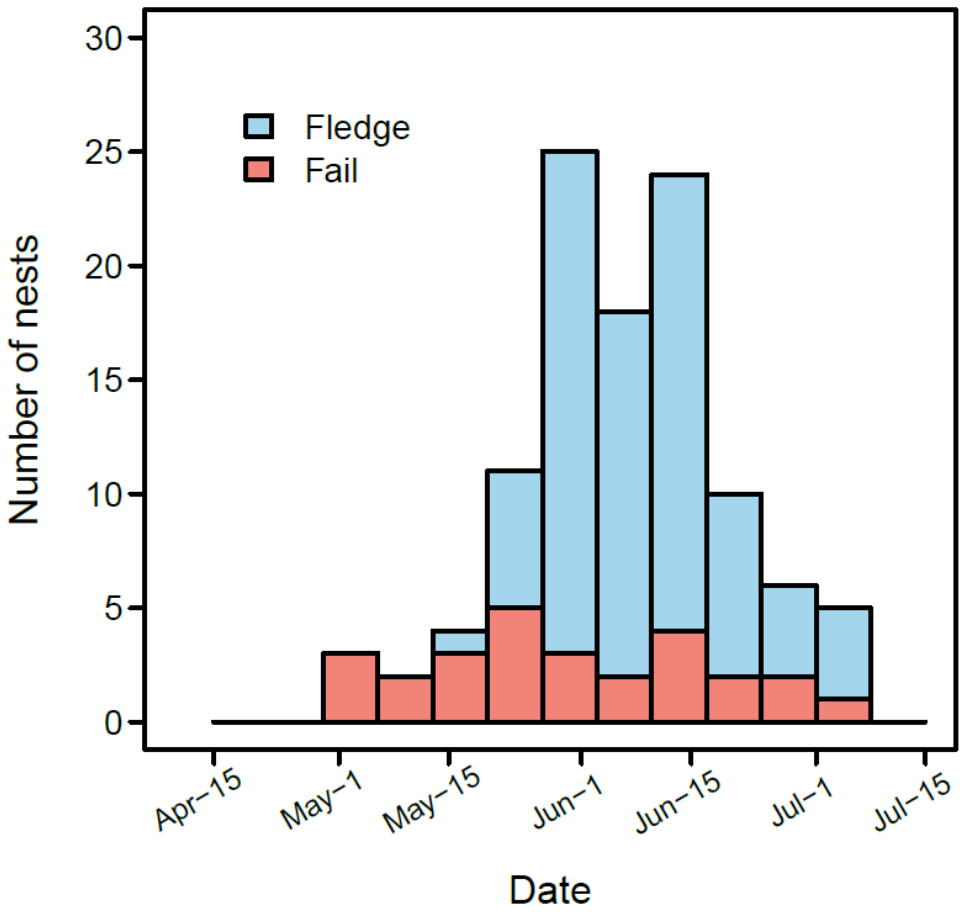

**Figure S1.** Fledging dates (at least one young permanently left the nest) and nest failure dates (nest confirmed depredated or abandoned) for Black-backed Woodpecker nests in northern California. Out of 118 nests, 81 fledged successfully, 27 failed, and 10 had an undetermined fate.

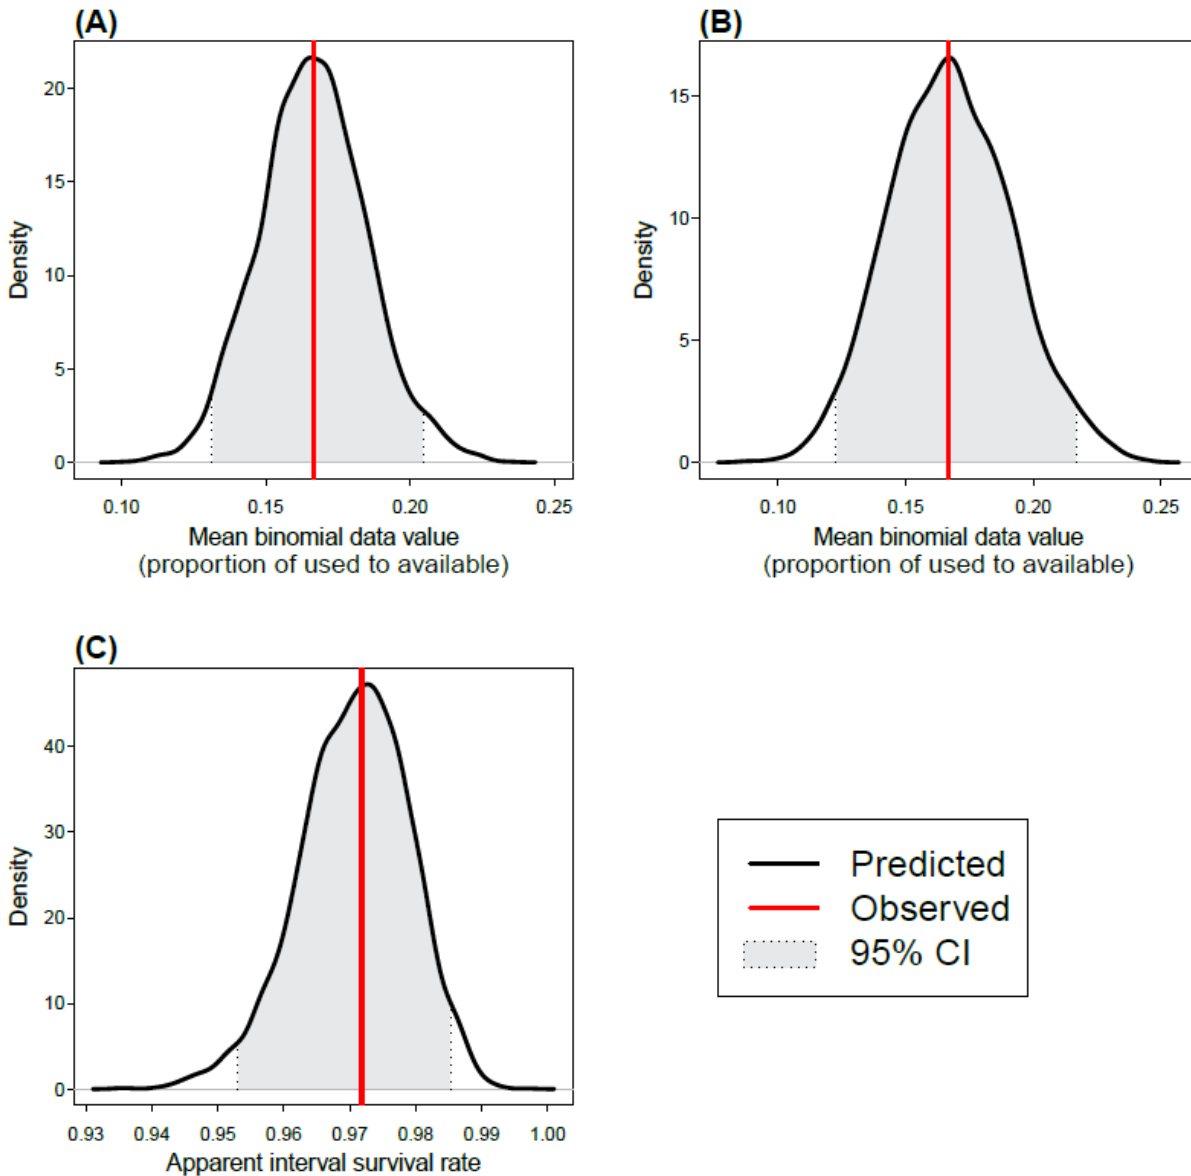

**Figure S2.** Posterior predictive checks indicated no evidence for lack of model fit for (A) the model of woodpecker nest stand selection, (B) the model of nest tree selection, and (C) the model of daily nest survival probability. A test statistic was created for each model based on the mean value of the observed response variable, which represents the ratio of used to available points in (A) and (B), and the apparent interval survival rate in (C). Red lines depict the observed value of the test statistic and solid black lines give the distribution of model-derived estimates with shaded 95% confidence intervals.
